# Supplementary material for: Cytotoxic Effects of Nanoliposomal Cisplatin and Diallyl Disulfide on Breast Cancer and Lung Cancer Cell Lines
Source: MDPI journal article supplement (doi:10.3390/biomedicines11041021), 2023-03-27
Supplement: s1 [file s1]

**Table S1.** IC<sub>50</sub> values for free drugs and nanoliposomal drugs on normal cell lines by MTT assay.

| No. | Drugs          | HEK-293         | L929            |
|-----|----------------|-----------------|-----------------|
| 1   | Free CDDP      | 22.21 ± 2.60 µM | 25.82 ± 1.21 µM |
| 2   | Free DADS      | 35.34 ± 1.34 µM | 38.95 ± 2.40 µM |
| 3   | Free CDDP/DADS | 18.19 ± 3.02 µM | 21.13 ± 0.92 µM |
| 4   | Lipo-CDDP      | 10.41 ± 1.54 µM | 12.62 ± 1.29 µM |
| 5   | Lipo-DADS      | 17.65 ± 0.94 µM | 19.48 ± 1.84 µM |
| 6   | Lipo-CDDP/DADS | 25.54 ± 1.72 µM | 35.12 ± 2.01 µM |

CDDP, cisplatin; DADS, diallyl disulfide; mean ± standard deviation (*n* = 3)
